# Supplementary material
Source: HighWire-hosted journal article supplement (https://jnm.snmjournals.org/highwire/filestream/94493/field_highwire_adjunct_files/0/123810_Supplemental_Data.pdf)
Supplement: 123810_Supplemental_Data.pdf [file 123810_Supplemental_Data.pdf]

---

## Supplemental Data

### 1. $\gamma$ -Ray Spectrometry of Irradiated $^{44}\text{Ca}$ -Targets

**Purpose.** To produce  $^{44}\text{Sc}$  via the  $^{44}\text{Ca}(p,n)^{44}\text{Sc}$ -nuclear reaction at a cyclotron, targets that contain either natural calcium ( $^{\text{nat}}\text{Ca}$ , mixture of Ca-isotopes) or enriched calcium ( $^{44}\text{Ca}$ ) can be irradiated (1-4). In order to investigate the difference among these possibilities we analyzed the composition of radioactive isotopes upon irradiation of targets composed of either  $^{\text{nat}}\text{CaCO}_3$  or  $^{44}\text{CaCO}_3$ .

**Experimental.** For preparation of the targets,  $^{\text{nat}}\text{CaCO}_3$  (200 mg, purum p.a., Fluka AG) or  $^{44}\text{CaCO}_3$  (5-10 mg, 97.0%, Trace Sciences International) combined with graphite powder (150 mg, 99.9999%, Alfa Aesar) was pressed by a target press device and encapsulated in aluminum. Targets were irradiated for 30-40 min at the cyclotron facility at PSI using a proton energy of  $17.6 \pm 1.8$  MeV and a beam current of 50  $\mu\text{A}$ . Next, the irradiated  $\text{CaCO}_3$ -targets were dissolved in 3 M HCl. Five hours (and 48 h) after the end of the irradiation (end of beam) aliquots of 1 mL were taken and analyzed by  $\gamma$ -ray spectrometry using an N-type high-purity germanium (HPGe) coaxial detector (EURISYS MESURES) and the Ortec InterWinner 5.0 software to determine the amount of  $^{44}\text{Sc}$  and co-produced radioisotopes.

**Results and Conclusion of the  $\gamma$ -Spectrometry.** Because of the natural abundances of calcium isotopes in  $^{\text{nat}}\text{Ca}$  ( $^{40}\text{Ca}$ : 96.94%;  $^{42}\text{Ca}$ : 0.65%;  $^{43}\text{Ca}$ : 0.14%,  $^{44}\text{Ca}$ : 2.09%;  $^{46}\text{Ca}$ : 0.004%; and  $^{48}\text{Ca}$ : 0.19%) irradiation of  $^{\text{nat}}\text{CaCO}_3$ -targets resulted in the production of  $^{44}\text{Sc}$  along with other Sc-radioisotopes ( $^{43}\text{Sc}$ , 4%,  $t_{1/2} = 3.89$  h;  $^{44\text{m}}\text{Sc}$ , 0.7%,  $t_{1/2} = 58.6$  h;  $^{47}\text{Sc}$ , 0.7%,  $t_{1/2} = 80.4$  h; and  $^{48}\text{Sc}$ , 0.7%,  $t_{1/2} = 43.7$  h) as shown on the  $\gamma$ -spectrum obtained from aliquots of dissolved  $^{\text{nat}}\text{CaCO}_3$ -target material upon irradiation (Supplemental Fig. 1A). The  $\gamma$ -spectrum of the irradiated enriched  $^{44}\text{CaCO}_3$ -target material showed high radionuclide purity with less than 1% of the co-produced longer-lived  $^{44\text{m}}\text{Sc}$  ( $\gamma$ -line of 271 keV) as the only by-product (Supplemental Fig. 1B). After 48 h ( $> 10$  half-lives of  $^{44}\text{Sc}$ ) the  $\gamma$ -spectrum of the same aliquot showed only remaining  $^{44\text{m}}\text{Sc}$  and its decay product  $^{44}\text{Sc}$  which proved the excellent radiochemical purity (Supplemental Fig. 1C).

Based on these results it was concluded that the production of  $^{44}\text{Sc}$  from enriched  $^{44}\text{Ca}$ -targets is the preferred method. As mentioned above,  $^{44}\text{Sc}$  which is produced from enriched  $^{44}\text{Ca}$ -targets, is obtained in much higher radiochemical purity compared to  $^{44}\text{Sc}$  produced from natural Ca-targets. A further advantage of using enriched  $^{44}\text{Ca}$ -targets is the much lower amount of  $^{44}\text{CaCO}_3$  (5-10 mg) which is required to obtain the same amount of  $^{44}\text{Sc}$  as would be required if  $^{\text{nat}}\text{CaCO}_3$  (200 mg) was irradiated. A smaller amount of  $\text{CaCO}_3$  is more favorable with regard to the separation procedure of  $^{44}\text{Sc(III)}$  from  $\text{Ca(II)}$ .

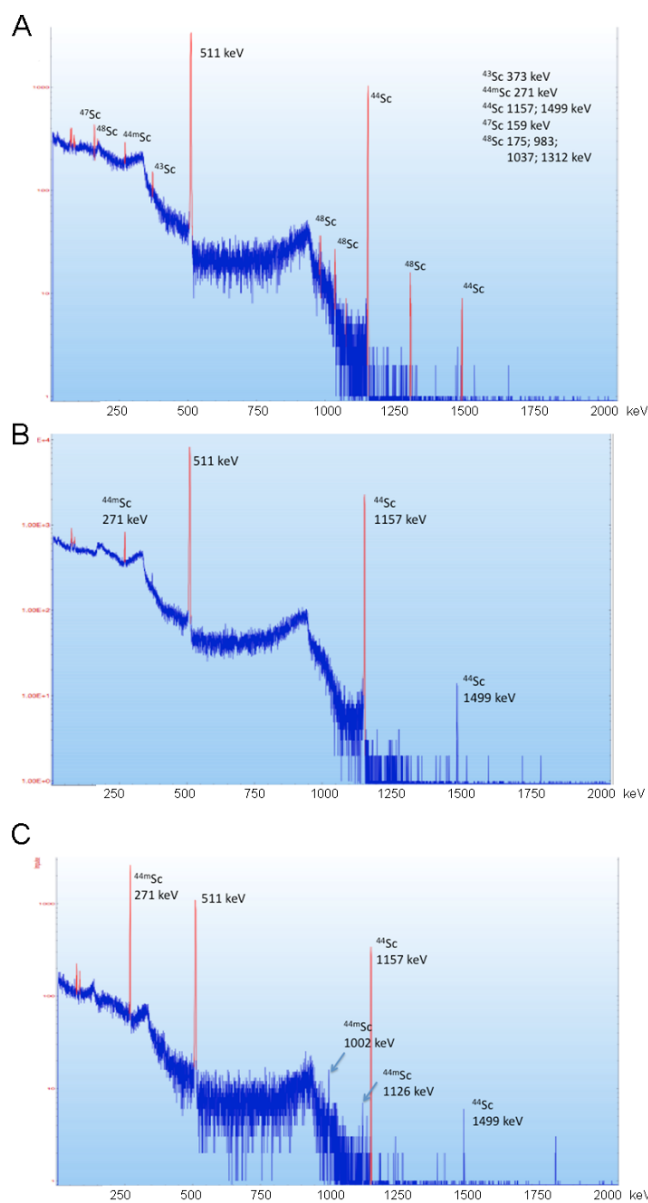

**SUPPLEMENTAL FIGURE 1.** (A)  $\gamma$ -Spectrum of a sample (1 mL) of irradiated  $^{nat}\text{CaCO}_3$  target material dissolved in HCl (3 M) 5 h after end of beam. (B)  $\gamma$ -Spectrum of a sample (1 mL) of irradiated enriched  $^{44}\text{CaCO}_3$  target material dissolved in HCl (3 M) 5 h after end of beam and (C) 48 h after end of irradiation.

## 2. Separation of $^{44}\text{Sc}$ from Irradiated $^{44}\text{Ca}$ -Targets

For separation of  $^{44}\text{Sc}$  from irradiated  $^{44}\text{Ca}$ -targets we developed a semi-automated separation system which was based on extraction chromatography and cation exchange chromatography. The experimental procedure is described in the main manuscript. A schematic illustration of the separation process is given in Supplemental Figure 2.

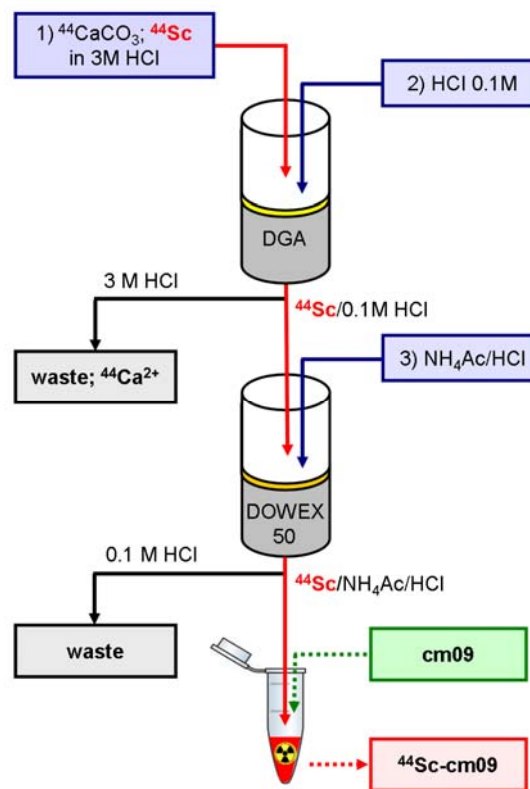

**SUPPLEMENTAL FIGURE 2.** Schematic illustration of the isolation of  $^{44}\text{Sc}$  from proton-irradiated  $^{44}\text{Ca}$ -targets (DGA = *N,N,N',N'*-tetra-*n*-octyldiglycolamide).

---

### 3. In Vitro Comparison of $^{44}\text{Sc}$ -cm09 and $^{177}\text{Lu}$ -cm09

**Purpose.** Formation of DOTA-complexes with  $^{44}\text{Sc}(\text{III})$  and  $^{177}\text{Lu}(\text{III})$  are supposed to occur according to the same coordination chemistry (5). In contrast to  $^{68}\text{Ga}$ -DOTA-complexes, which differ significantly from  $^{177}\text{Lu}$ -DOTA complexes, similar chemical characteristics of  $^{44}\text{Sc}(\text{III})$  and  $^{177}\text{Lu}(\text{III})$  would allow comparison of biomolecules labeled with either of these radioisotopes (6). In order to compare the characteristics of  $^{44}\text{Sc}$ -cm09 with  $^{177}\text{Lu}$ -cm09 we investigated the retention times of the compounds using the same HPLC method and determined the *n*-octanol/PBS distribution coefficients (LogD values). Both parameters are dependent on the hydrophilicity of a specific radioconjugate.

**Experimental.** High-performance liquid chromatography (HPLC) was performed using a C-18 reversed phase column (Xterra MS C18, 5  $\mu\text{m}$ , 15 cm x 4.6 cm, Waters) with a mobile phase consisting of MilliQ water with 0.1 % trifluoroacetic acid (A) and methanol (B) with a linear gradient from 95% A and 5% B to 20% A and 80% B over 25 min and a flow rate of 1 mL/min. The experimental procedure for the determination of the logD value is reported in the main manuscript and in previous publications (7, 8).

**Results and Conclusion of the In Vitro Comparison of  $^{44}\text{Sc}$ -cm09 and  $^{177}\text{Lu}$ -cm09.** Representative HPLC chromatograms of  $^{44}\text{Sc}$ -cm09 and  $^{177}\text{Lu}$ -cm09 are shown in Supplemental Fig. 3. The retention time of  $^{44}\text{Sc}$ -cm09 ( $R_t = 19.6$  min, Supplemental Fig. 3A) was about the same as obtained for  $^{177}\text{Lu}$ -cm09 ( $R_t = 19.7$  min, Supplemental Fig. 3B). The logD value of  $^{44}\text{Sc}$ -cm09 was  $-4.49 \pm 0.12$  as reported in the main manuscript. This value was similar to the logD value of  $^{177}\text{Lu}$ -cm09 ( $-4.25 \pm 0.41$ ) (7).

These results indicate similar characteristics of  $^{44}\text{Sc}$ -cm09 and  $^{177}\text{Lu}$ -cm09 with regard to their hydrophilicity. These findings are in agreement with the theory of identical coordination chemistry among the two radioisotopes  $^{44}\text{Sc}$  and  $^{177}\text{Lu}$ .

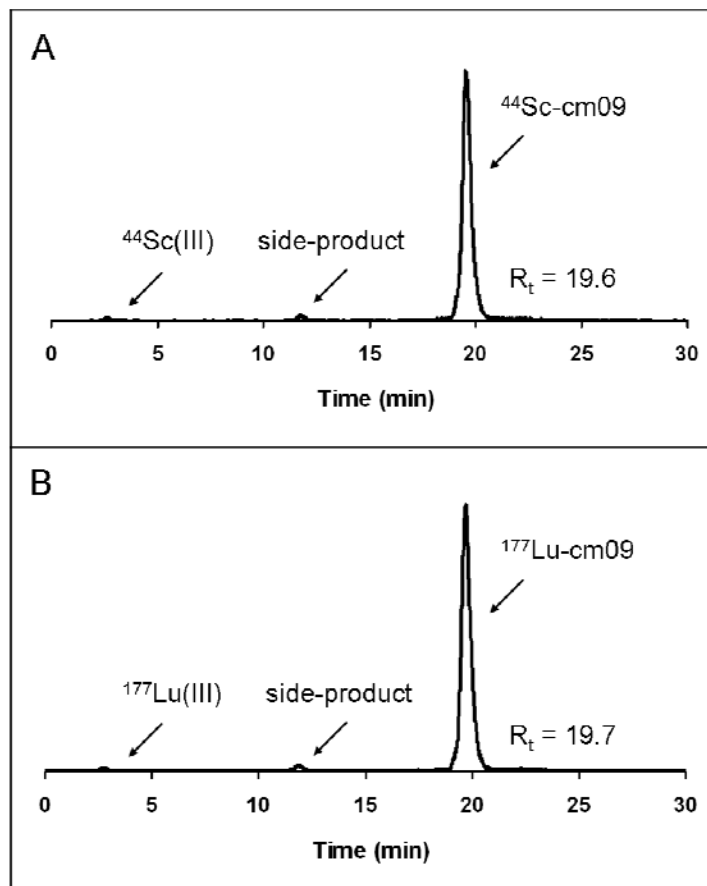

**SUPPLEMENTAL FIGURE 3.** Representative HPLC chromatograms of  $^{44}\text{Sc-cm09}$  (A) and  $^{177}\text{Lu-cm09}$  (B).

---

#### 4. **Additional** PET Imaging Studies with $^{44}\text{Sc-cm09}$

**Purpose.** In order to investigate FR specific accumulation of  $^{44}\text{Sc-cm09}$  in KB tumor xenografts, we also performed PET imaging studies with a tumor bearing mouse which was injected with excess folic acid prior to the radiotracer. It was expected that blockade of FRs by folic acid would result in a significant decline of  $^{44}\text{Sc-cm09}$  uptake in the tumor tissue.

**Experimental Procedure.** Imaging studies were performed with nude mice ~ 14 days after KB tumor cell inoculation.  $^{44}\text{Sc-cm09}$  (~ 25 MBq, ~ 6 nmol per mouse, 100  $\mu\text{L}$ ) was injected either as a single agent or immediately after injection of excess folic acid (100  $\mu\text{g}$  in 100  $\mu\text{L}$  PBS). PET scans of 30 min duration were performed with each of the two mice 4 h after injection of the radioconjugate.

**Results and Conclusion of Additional PET Imaging Studies with  $^{44}\text{Sc-cm09}$ .** PET images of a mouse which received folic acid prior to the injection of  $^{44}\text{Sc-cm09}$  showed reduced uptake of radioactivity in the tumor xenografts compared to the tumor uptake of  $^{44}\text{Sc-cm09}$  found in the mouse which received only  $^{44}\text{Sc-cm09}$ . These results confirmed FR specific uptake of  $^{44}\text{Sc-cm09}$  since injection of excess folic acid blocked FRs and, hence, prevented uptake of  $^{44}\text{Sc-cm09}$  (Supplemental Fig. 4).

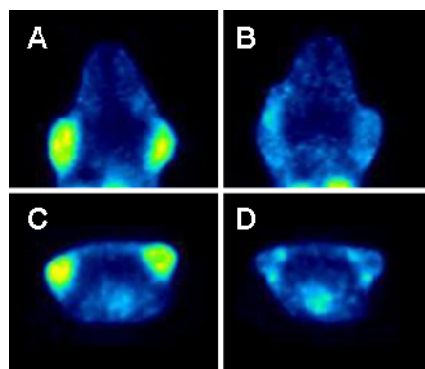

**SUPPLEMENTAL FIGURE 4.** PET images as coronal (A, B) and transaxial sections (C, D) of KB tumor bearing mice injected with  $^{44}\text{Sc-cm09}$  only (A, C) or with  $^{44}\text{Sc-cm09}$  and preinjected folic acid to block FRs (B, D).

## 5. In Vivo Biodistribution Data of $^{177}\text{Lu-cm09}$

The tissue distribution data of  $^{177}\text{Lu-cm09}$  in KB tumor bearing nude mice at different time points after injection are given in Supplemental Table 1.

**SUPPLEMENTAL TABLE 1**

Biodistribution of  $^{177}\text{Lu-cm09}$  in KB Tumor Bearing Female Nude Mice (7).

|                 | $^{177}\text{Lu-cm09}$           |              |              |              |
|-----------------|----------------------------------|--------------|--------------|--------------|
|                 | % injected dose per gram tissue* |              |              |              |
|                 | 1 h p.i.                         | 2 h p.i.     | 4 h p.i.     | 24 h p.i.    |
| Blood           | 8.15 ± 1.21                      | 6.76 ± 0.95  | 4.38 ± 0.95  | 1.22 ± 0.19  |
| Lung            | 4.58 ± 0.83                      | 3.71 ± 0.65  | 2.70 ± 0.24  | 1.03 ± 0.20  |
| Spleen          | 1.59 ± 0.25                      | 1.50 ± 0.42  | 1.18 ± 0.19  | 0.63 ± 0.16  |
| Kidneys         | 15.79 ± 2.13                     | 23.23 ± 1.49 | 28.05 ± 1.35 | 30.09 ± 4.04 |
| Stomach         | 2.04 ± 0.11                      | 1.89 ± 0.59  | 1.45 ± 0.25  | 0.70 ± 0.14  |
| Intestines      | 1.43 ± 0.31                      | 1.07 ± 0.24  | 0.90 ± 0.20  | 0.29 ± 0.11  |
| Liver           | 4.40 ± 0.14                      | 3.98 ± 0.65  | 3.86 ± 0.65  | 1.80 ± 1.54  |
| Salivary glands | 6.78 ± 1.41                      | 6.35 ± 1.05  | 6.23 ± 0.69  | 3.64 ± 0.49  |
| Muscle          | 1.30 ± 0.06                      | 1.31 ± 0.04  | 1.26 ± 0.06  | 0.96 ± 0.22  |
| Bone            | 1.48 ± 0.08                      | 1.49 ± 0.16  | 1.23 ± 0.14  | 0.62 ± 0.13  |
| Tumor           | 10.84 ± 1.32                     | 14.67 ± 1.65 | 18.12 ± 1.80 | 19.46 ± 3.13 |
| Tumor-to-blood  | 1.36 ± 0.27                      | 2.18 ± 0.18  | 4.32 ± 1.15  | 16.02 ± 1.52 |
| Tumor-to-liver  | 2.47 ± 0.31                      | 3.71 ± 0.30  | 4.73 ± 0.39  | 7.77 ± 0.62  |
| Tumor-to-kidney | 0.69 ± 0.04                      | 0.63 ± 0.06  | 0.65 ± 0.07  | 0.65 ± 0.07  |

\* values shown represent the mean ± S.D. of data from three animals (n=3) per cohort

## 6. Comparison of $^{44}\text{Sc}$ and $^{68}\text{Ga}$ PET Using Derenzo Phantoms

**Purpose.** In order to investigate the resolution and PET image quality of  $^{44}\text{Sc}$  and  $^{68}\text{Ga}$  we performed a site-by-site comparison of these two radioisotopes using Derenzo phantoms and a small-animal PET scanner.

**Experimental Procedure.** PET scans of Derenzo phantoms were performed with a dedicated small-animal PET/CT camera (Vista eXplore, GE Healthcare). Two Derenzo phantoms with hole-diameters ranging from 0.8 to 1.3 mm, in 0.1-mm steps

---

were filled with ~ 9 MBq of  $^{68}\text{Ga}(\text{III})$  and ~ 9 MBq of  $^{44}\text{Sc}(\text{III})$ , respectively, in a volume of 600  $\mu\text{L}$ . Static PET scans of 30 min duration were acquired of each phantom. Reconstruction of PET data was performed using the instrument's software. For reconstruction, the 2-dimensional ordered-subset expectation maximization (2D-OSEM) algorithm was used.

**Results and Conclusion Comparison of  $^{44}\text{Sc}$  and  $^{68}\text{Ga}$  PET Using Derenzo Phantoms.** PET imaging of a Derenzo phantom filled with  $^{44}\text{Sc}$  revealed an excellent resolution of ~1.2 mm (Supplemental Fig. 5A). These findings were similar or even superior to those obtained with an equivalent Derenzo phantom filled with about the same amount of  $^{68}\text{Ga}$ -radioactivity (Supplemental Fig 5B).

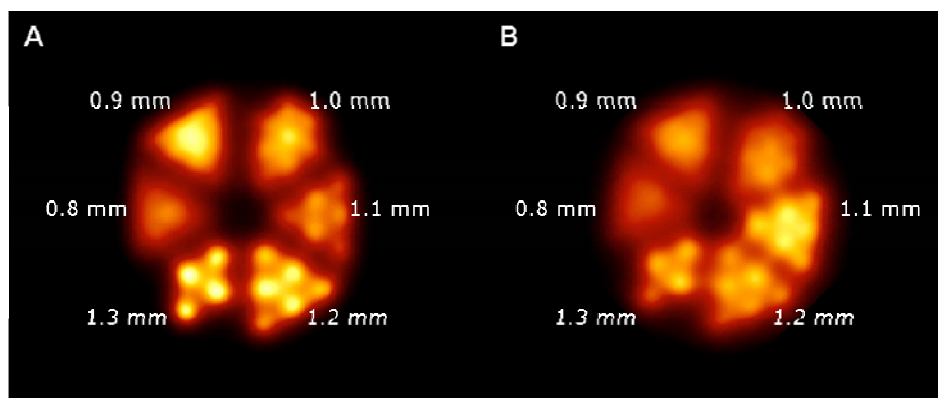

**SUPPLEMENTAL FIGURE 5.** PET images of Derenzo phantoms. A:  $^{44}\text{Sc}$  (~ 9 MBq, scan time: 30 min) and B:  $^{68}\text{Ga}$  (~ 9 MBq, scan time: 30 min).



---

## REFERENCES

1. Severin GW, Engle JW, Valdovinos HF, Barnhart TE, Nickles RJ. Cyclotron produced  $^{44g}\text{Sc}$  from natural calcium. *Appl Radiat Isot.* 2012;70:1526-1530.
2. Krajewski S, Cydzik I, Abbas K, et al. Simple procedure of DOTATATE labelling with cyclotron produced  $^{44}\text{Sc}$  and  $^{43}\text{Sc}$ . *Nucl Med Rev.* 2012;15:A22-A46.
3. Kamel A, Izabela C, Federica S, Seweryn K, Agata K, Aleksander B. Cyclotron production of  $^{44}\text{Sc}$  - new radionuclide for PET technique. *J Labelled Compd Rad.* 2011;54:S53-S53.
4. Zhernosekov K, Bunka M, Schibli R, Türler A. Development of  $^{44}\text{Sc}$  production for radiopharmaceutical applications. *Radiother Oncol.* 2012;102:S141.
5. Viola-Villegas N, Doyle RP. The coordination chemistry of 1,4,7,10-tetraazacyclododecane-*N,N',N'',N'''*-tetraacetic acid ( $\text{H}_4\text{DOTA}$ ): Structural overview and analyses on structure-stability relationships. *Coordin Chem Rev.* 2009;253:1906-1925.
6. Majkowska-Pilip A, Bilewicz A. Macrocyclic complexes of scandium radionuclides as precursors for diagnostic and therapeutic radiopharmaceuticals. *J Inorg Biochem.* 2011;105:313-320.
7. Müller C, Struthers H, Winiger C, Zhernosekov K, Schibli R. DOTA conjugate with an albumin-binding entity enables the first folic acid-targeted  $^{177}\text{Lu}$ -radionuclide tumor therapy in mice. *J Nucl Med.* 2013;54:124-131.
8. Müller C, Mindt TL, de Jong M, Schibli R. Evaluation of a novel radiofolate in tumour-bearing mice: promising prospects for folate-based radionuclide therapy. *Eur J Nucl Med Mol Imaging.* Jun 2009;36:938-946.
